# Supplementary material for: Mode of Entry to an Early Intervention Service for Psychotic Disorders: Determinants and Impact on Outcome
Source: Atypon-hosted journal article supplement (doi:10.1176/appi.ps.201200474), 2013-11-01
Supplement: 1166_ds001.pdf [file 1166_ds001.pdf]

## Supplementary Material

**Table 1**  
Socio-demographic characteristics for inpatients and outpatients.

|                                                         | Inpatients<br>(n = 157) | Outpatients<br>(n = 102) | Statistic (df)      | p-value* |
|---------------------------------------------------------|-------------------------|--------------------------|---------------------|----------|
| Gender, N (%)                                           |                         |                          |                     |          |
| Male                                                    | 106 (67.5)              | 71 (69.6)                | $\chi^2$ (1) = .13  | .72      |
| Female                                                  | 51 (32.5)               | 31 (30.4)                |                     |          |
| Living Circumstances, N (%)                             |                         |                          |                     |          |
| Alone                                                   | 21 (16.2)               | 15 (16.1)                | $\chi^2$ (3) = 6.60 | .086     |
| Partner/Family                                          | 94 (72.3)               | 72 (77.4)                |                     |          |
| Roommates                                               | 15 (11.5)               | 6 (6.5)                  |                     |          |
| Other                                                   | 7 (5.1)                 | 0 (0)                    |                     |          |
| Ethnicity, N (%)                                        |                         |                          |                     |          |
| Caucasian                                               | 99 (65.1)               | 66 (66.7)                | $\chi^2$ (1) = .06  | .80      |
| Non-Caucasian                                           | 53 (34.9)               | 33 (33.3)                |                     |          |
| Diagnosis, N (%)                                        |                         |                          |                     |          |
| Schizophrenia SD                                        | 110 (70.1)              | 85 (83.3)                | $\chi^2$ (1) = .06  | .016     |
| Affective Psychosis                                     | 47 (29.9)               | 17 (16.7)                |                     |          |
| Age at Entry, Mean (SD)                                 | 22.4 (4.0)              | 23.0 (4.0)               | t(257) = 1.01       | .31      |
| <sup>a</sup> Duration of Untreated Psychosis,<br>N (SD) | 44.5 (95.6)             | 67.2 (106.6)             | t(252) = 3.2        | .001     |

<sup>a</sup>Duration of untreated psychosis values are presented in raw form; however, these were analyzed using transformed data.

\*p-value < 0.05 is regarded as statistically significant.

**Supplementary Table 2**

Clinical characteristics at baseline for inpatients and outpatients.

|                                   | Inpatients<br>mean (SD) | Outpatients<br>Mean (SD) | Statistic (df) | p-value* |
|-----------------------------------|-------------------------|--------------------------|----------------|----------|
| Suicidality (n =244)              | 2.42 (1.7)              | 2.17 (1.4)               | t(242) = 1.28  | .22      |
| Guilt (n =245)                    | 2.58 (1.9)              | 2.54 (1.7)               | t(243) = .19   | .85      |
| Hostility (n =245)                | 3.57 (1.9)              | 2.87 (1.7)               | t(242) = 3.04  | .003     |
| Elevated mood (n =244)            | 2.24 (1.7)              | 1.83 (1.4)               | t(242) = 2.00  | .047     |
| Grandiosity (n =245)              | 3.53 (2.3)              | 3.44 (2.3)               | t(242) = .28   | .78      |
| Suspiciousness (n =245)           | 5.10 (1.8)              | 4.75 (1.8)               | t(242) = 1.48  | .14      |
| Hallucinations (n =245)           | 3.96 (1.9)              | 3.70 (1.9)               | t(242) = 1.10  | .28      |
| Unusual thought content (n =245)  | 5.47 (1.3)              | 5.12 (1.3)               | t(242) = 2.00  | .048     |
| Bizarre behavior (n =245)         | 3.90 (1.7)              | 3.04 (1.6)               | t(242) = 3.97  | <.001    |
| BPRS total score (n =242)         | 67.27 (12.6)            | 62.53 (11.6)             | t(242) = 3.00  | .003     |
| SANS total score (n =257)         | 30.9 (15.6)             | 29.6 (15.8)              | t(242) = .65   | .52      |
| GAF score (n=258), median (range) | 30 (10-65)              | 30 (10-51)               | U = 5541       | <.001    |

\*p-value &lt; 0.05 is regarded as statistically significant.

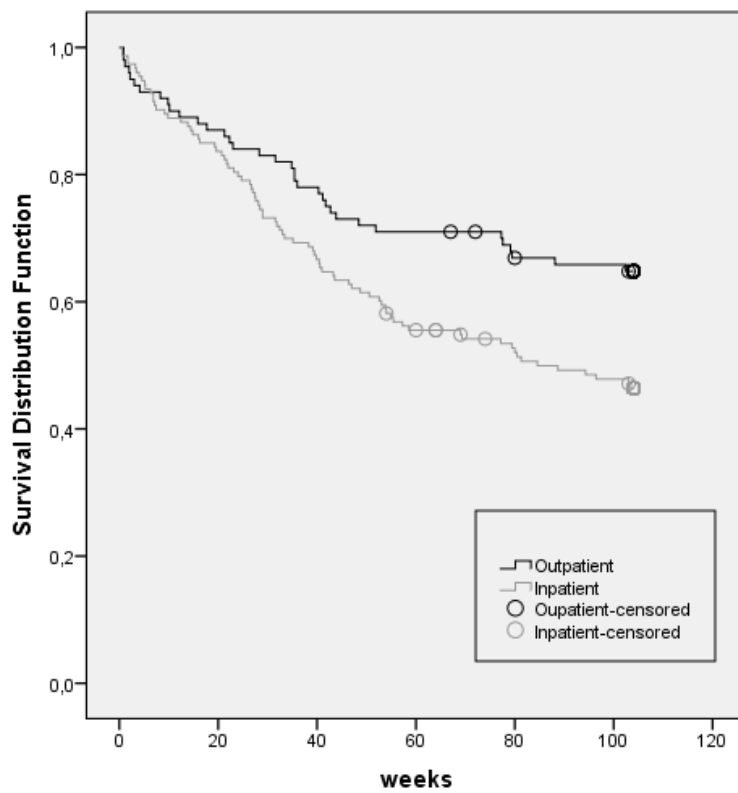

**Supplementary Figure 1. 7** estimate for time to subsequent hospitalization
